# Supplementary material for: Development and Validation of a Nomogram Incorporating GSTO1 for Predicting Postoperative Cognitive Dysfunction After Cardiac Valve Replacement
Source: Research Square preprint supplement (doi:10.21203/rs.3.rs-8762813/v1), 2026-02-17
Supplement: Supplementary file 1 [file 743456d072490d8da7bc44f0.docx]

**Supplementary materials**

**1 Criteria for Assessing Cognitive Impairment**

(1) Preoperative Screening: One day before surgery, conduct a Mini-Mental State Examination (MMSE) to screen patients. Patients with a score of ≤ 23 are excluded (to exclude patients with low cognitive function).

(2) Postoperative Assessment: Perform MMSE and Montreal Cognitive Assessment (MoCA) evaluations on the 2nd day after surgery, 1 day before discharge, and at 6 weeks after surgery. The researcher (a fixed individual) records the scores for each completed test. Considering the learning effect caused by repeated testing, the Reliable Change Index (RCI) is used to calculate the learning effect, and Z scores are calculated by subtracting the learning effect from the difference between each postoperative score and the preoperative score, and then dividing the difference by the standard deviation of the healthy control group (the spouses of surgical patients).

Learning Effect: Fifty healthy control subject (patients’ spouses) are assessed simultaneously according to the preoperative and postoperative timing of surgical patients. The postoperative score of each assessment is subtracted from the preoperative score, and the mean value of each assessment is calculated.

Criteria for Assessing Postoperative Neurological Dysfunction (PND): Z score of < -1.96 in any two individual tests within the two assessment scales.

**Postoperative Score - Preoperative Score - Leaning Effect**

**Z=**

**Preoperative Standard Deviation**

**Results:**

1. Relevant baseline information of the healthy control group (patient spouses) for calculating the learning effect.

Table S1. Demographic characteristics of healthy control group and surgical group

were compared before surgery

| **Parameter** | **Healthy control group**  **（n=50）** | **Surgical group（n=278）** | ***P*-value** |
| --- | --- | --- | --- |
| **Gender** (%) |  |  | 0.760 |
| Female/male | 27/23 | 142/136 |  |
| **Age** (y) (mean±SD) | 55.00[48.75, 60.00] | 56.00[50.75, 63.00] | 0.209 |
| **BMI** (mean±SD) | 22.45[20.35, 25.90] | 21.64[19.57, 24.00] | 0.161 |
| **Education** (%) |  |  | 0.430 |
| 3/6/9/12/15 years | 9/16/18/6/1 | 71/84/102/17/4 |  |
| **MMSE (before surgery)** | 28.00[26.00, 30.00] | 27.00[26.00,28.00] | 0.158 |

The above data show that there is no statistical difference in preoperative baselines between the healthy control group (spouses of surgical patients) and the surgical group, indicating that it is feasible to calculate the learning effect and standard deviation using the healthy control group to compute the Z-score.

**2** ELISA Enzyme-Linked Immunosorbent Assay Verification

(1) Standard Dilution: Dilute the original standard provided in the target protein kit appropriately according to the concentration gradient.

(2) Sample Loading: Set up blank wells (as controls, without adding samples or enzyme-labeled reagents but performing all other operations), standard wells, and sample wells to be tested on the enzyme-coated plate. Add 50 microliters of standard to the standard wells, and for the sample wells to be tested, first add 40 microliters of sample diluent, followed by 10 microliters of sample to be tested (resulting in a final sample dilution of 5 times). Ensure that samples are added directly to the bottom of the enzyme plate wells, avoiding contact with the well walls, and gently shake to mix.

(3) Incubation: Cover the enzyme plate with a sealing film and incubate it in a 37°C environment for 30 minutes.

(4) Preparation of Wash Solution: Dilute the provided 20x concentrated wash solution with distilled water to a 20x dilution for later use.

(5) Washing: Carefully remove the sealing film, discard the liquid in the wells, and blot dry the enzyme plate. Then fill each well with wash solution, let stand for 30 seconds, discard again, and repeat this washing process a total of 5 times. Finally, ensure the enzyme plate is patted dry.

(6) Addition of Enzyme-Labeled Reagent: Add 50 microliters of enzyme-labeled reagent to each well, except for the blank wells.

(7) Second Incubation: Follow the same procedure as step 3.

(8) Second Washing: Follow the same procedure as step 5.

(9) Color Development: Add 50 microliters of color developer A to each well, followed by 50 microliters of color developer B. Gently shake the enzyme plate to mix well, and then incubate it in the dark at 37°C for 10 minutes for color development.

(10) Reaction Termination: Add 50 microliters of stop solution to each well to terminate the color development reaction (at this point, the blue color in the wells will immediately turn yellow).

(11) Measurement of Absorbance: Use the blank well as the zero point and measure the absorbance (OD value) of each well in sequence at a wavelength of 450 nm. Note that the measurement should be completed within 15 minutes after adding the stop solution.

**3** There were no statistical differences in clinical baselines between the training set and validation set patients (*P*>0.05). Please see S2 for details.

Table S2. Demographic and clinical characteristics of all patients

| Characteristic | **Level** | **Overall** | **Vadilation group** | **Trainning group** | ***p*** |
| --- | --- | --- | --- | --- | --- |
| n |  | 278 | 83 | 195 |  |
| Groups (%) | C/P | 228 /50 | 67 /16 | 161 /34 | 0.715 |
| Sex (%) | Male/Female | 136/142 | 37 /46 | 99 /96 | 0.345 |
| Years  (median[IQR]) |  | 56.00 [51.00, 63.00] | 58.00 [53.00, 64.00] | 55.00 [50.00, 62.50] | 00.062 |
| Year grade (%) | 45~54/55~64/65~75years | 113/104/61 | 28 /34/21 | 85 /70/40 | 0.301 |
| Aducation (%) | 3/6/9 /12/15years | 71/84/102/17/4 | 16 /32/29/6/0 | 55/52/73/11/4 | 0.16 |
| Smoking (%) | No/Yes | 154 /124 | 42/41 | 112/83 | 0.294 |
| wine (%) | No/Yes | 180 /98 | 56 /27 | 124 /71 | 0.535 |
| BMI  (median [IQR]) |  | 21.64 [19.58, 23.97] | 21.45 [19.40, 23.08] | 21.80 [19.70, 24.41] | 0.096 |
| ASA (%) | Ⅰ/Ⅱ/Ⅲ/Ⅳ | 1 /30/245/2 | 0 /7/74/2 | 1 /23/171/0 | 0.125 |
| MMSE before sugery |  | 27.40±1.54 | 27.35±1.57 | 27.64±1.37 | 0.221 |

**4** Comparison of MMSE and MoCA scale scores between group C and group P in the training cohort and validation cohort.

**Table S3**. MMSE and MoCA scores of patients in the two groups of

the training cohort at different time points

|  | **MMSE** | |  | **MoCA** | |
| --- | --- | --- | --- | --- | --- |
|  | **C group**  **（n=161）** | **P group**  **（n=34）** |  | **C group （n=161）** | **P group**  **（n=34）** |
| **Before surgery** | 27.42±1.61 | 27.20±1.90 |  | 25.44±1.73 | 25.41±1.28 |
| **postoperative day 2** | 27.11±1.73 | 23.35±1.72＊# |  | 25.37±1.97 | 22.35±2.18＊# |
| **Before discharge** | 28.21±1.46# | 25.47±1.44＊# |  | 25.88±1.77# | 22.00±1.67＊# |
| **6w after surgery** | 28.44±1.36# | 26.17±1.31＊# |  | 26.18±1.31# | 22.09±1.68＊# |

Note: *In comparison to the group non-P, *P* < 0.05.

#Compared to before surgery, *P* < 0.05.

**Table S4**. MMSE and MoCA scores of patients in the two groups of

the validation cohort at different time points

|  | **MMSE** | |  | **MoCA** | |
| --- | --- | --- | --- | --- | --- |
|  | **C group**  **（n=67）** | **P group**  **（n=16）** |  | **C group**  **（n=67）** | **P group**  **（n=16）** |
| **Before surgery** | 27.52±1.98 | 27.00±1.10 |  | 24.77±1.75 | 24.94±1.48 |
| **postoperative day 2** | 27.67±1.77 | 25.06±2.67＊# |  | 26.19±2.48# | 21.37±2.41＊# |
| **Before discharge** | 26.37±2.13# | 24.25±1.48＊# |  | 25.61±2.59 | 22.25±1.57＊# |
| **6w after surgery** | 28.56±1.53# | 26.81±1.28＊ |  | 25.97±1.51# | 22.38±1.45＊# |

Note: *In comparison to the group non-P, *P* < 0.05.

#Compared to before surgery, *P* < 0.05.
